# Supplementary material
Source: publisher figshare collection journal article supplement (https://sage.figshare.com/ndownloader/files/20907495)
Supplement: Supplementary file 1 [file 20907495]

**Supplementary Table 1.** Antibody titers determined in the virus neutralization test against BVDV-1a, -1b, and -2 in swine serum tested in our study.

| Sample identification | Anti-BVDV-1a titer | Anti-BVDV-1b titer | Anti-BVDV-2 titer |
|-----------------------|--------------------|--------------------|-------------------|
| 052/03                | 512                | <8                 | <8                |
| 052/04                | 256                | <8                 | <8                |
| 122/03                | 16                 | <8                 | <8                |
| 252/09                | 16                 | 8                  | <8                |
| 062/01                | <8                 | 256                | <8                |
| 259/04                | <8                 | 256                | <8                |
| 076/01                | <8                 | 256                | 16                |
| 135/03                | <8                 | 128                | 8                 |
| 135/01                | 64                 | 512                | 32                |
| 002/08                | <8                 | 32                 | <8                |
| 051/03                | <8                 | 32                 | <8                |
| 232/03                | <8                 | 32                 | <8                |
| 180/08                | <8                 | 16                 | <8                |
| 135/05                | <8                 | 32                 | 16                |
| 252/08                | 1,024              | 2,048              | <8                |
| 217/06                | 32                 | 64                 | 16                |
| 008/01                | <8                 | 16                 | 512               |
| 153/02                | 16                 | 8                  | 1,024             |
| 181/01                | 8                  | 64                 | 1,024             |
| 181/02                | 8                  | 16                 | 1,024             |
| 222/04                | 16                 | 16                 | 1,024             |
| 154/01                | <8                 | <8                 | 128               |
| 154/05                | <8                 | <8                 | 32                |
| 154/02                | <8                 | 64                 | 512               |
| 154/03                | 16                 | 16                 | 128               |
| 233/06                | 256                | <8                 | 1,024             |
| 180/05                | 128                | 64                 | 128               |

The antibody titers are expressed as the reciprocal value of the maximum dilution of the sample in which neutralizing antibodies were detected (<8 means that these samples tested negative in the start dilution of the assay, which was 1:8). When cross-neutralization occurs between 2 or 3 reference strains, higher titers (>4-fold) are shaded in dark gray; high titer (but <4-fold) are shaded in light gray.
